# Supplementary material
Source: Springer Nature journal article supplement (https://www.springermedizin.de/resource/supplementary/12936_2007_424_MOESM3_ESM.pdf/9547416)
Supplement: MOESM3 [file 9547416]

- Accommodate the diversity in study designs and data collection methods
- Minimise systematic bias
- Maximise the use of the available data
- Account for all patients enrolled in study
- Create a well-defined, transparent and reproducible method of analysis
- Allow flexibility in case of changes in definitions of the therapeutic response
- Provide a resource that is easy to use and sustainable
